# Supplementary material for: Lessons from the 2018–2019 European droughts: A collective need for unifying drought risk management
Source: Copernicus journal article supplement (doi:10.5194/nhess-2021-276), 2021-10-13
Supplement: Supplementary file 1 [file nhess-2021-276-supplement.pdf]

## Supplements

### **Introduction**

The tables and figures displayed in the main body present a synthesis and insights from the pan-European comparison of the hydro-climatic analysis and survey responses. Here, more detailed aspects of the hydroclimatic situation from 2018 to 2019 are presented in Fig. S1, and individual country-specific responses of the pan-European questionnaire are shown in Figs. S2-S7 as well as the questionnaire as distributed to the participants (in English) in Table S1.

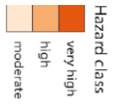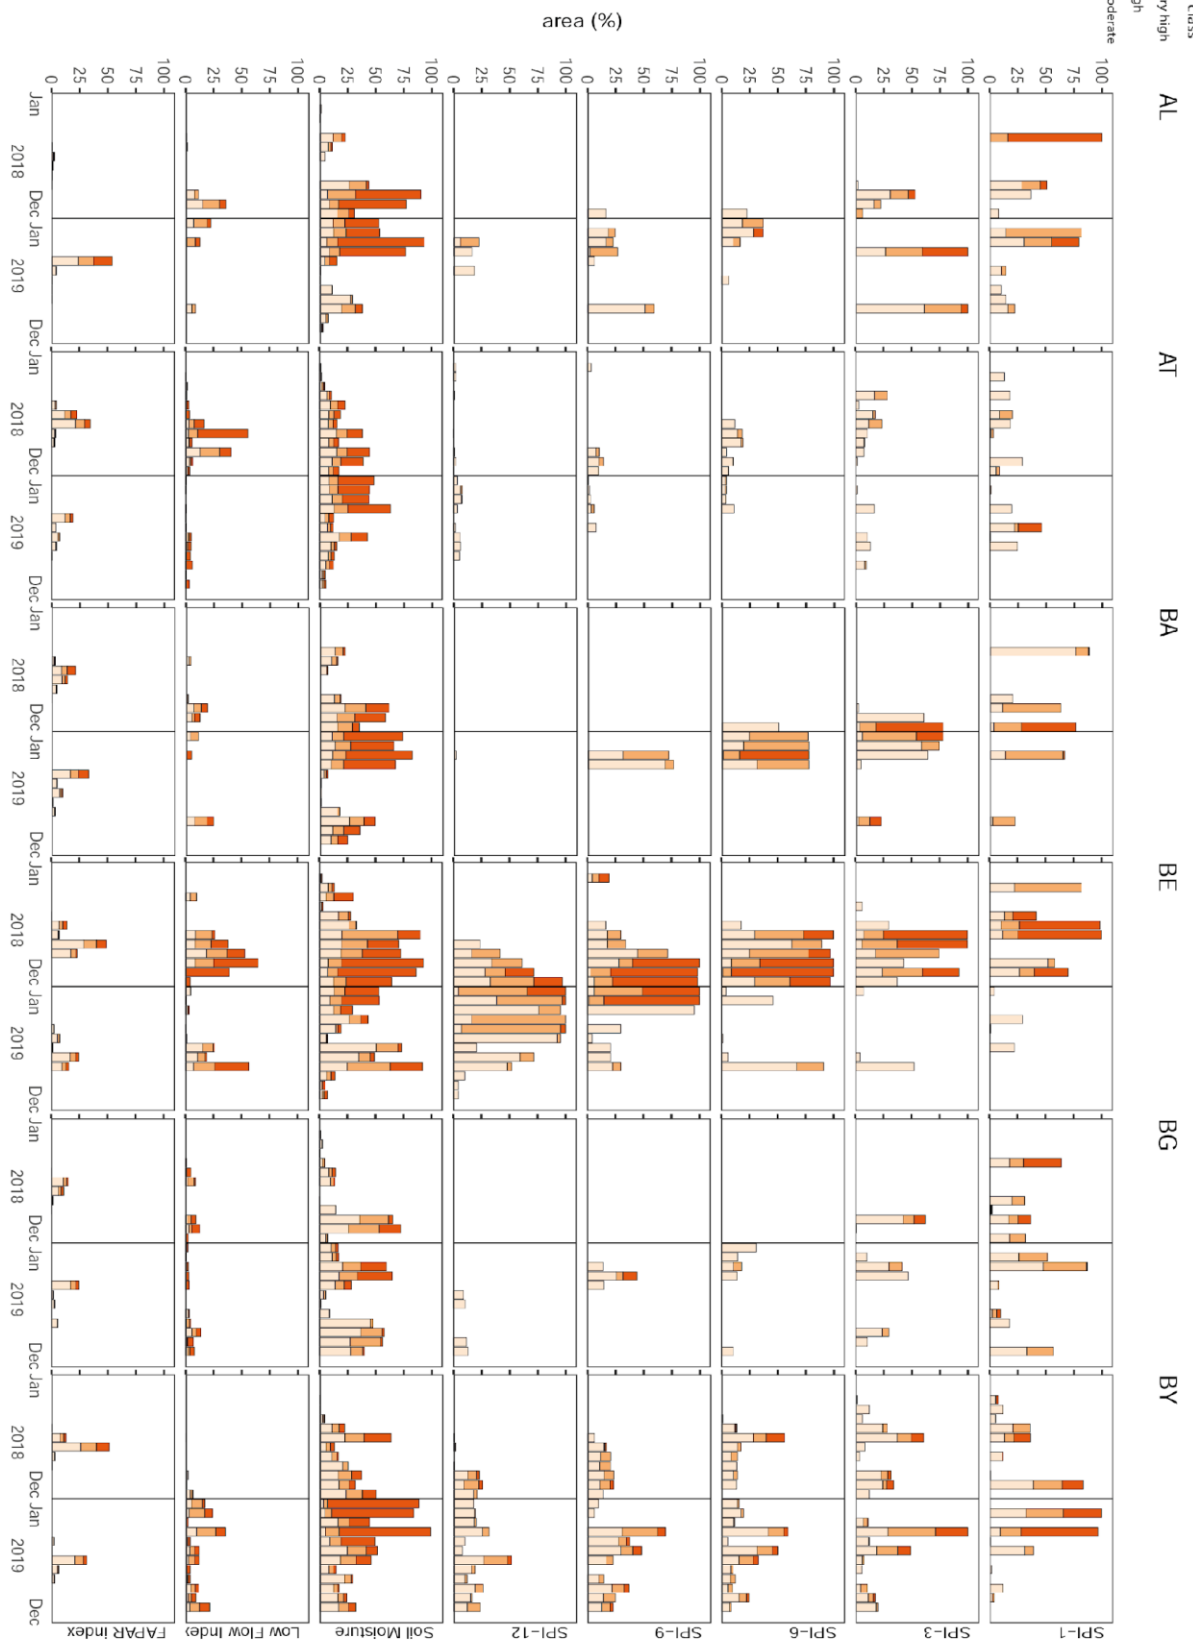

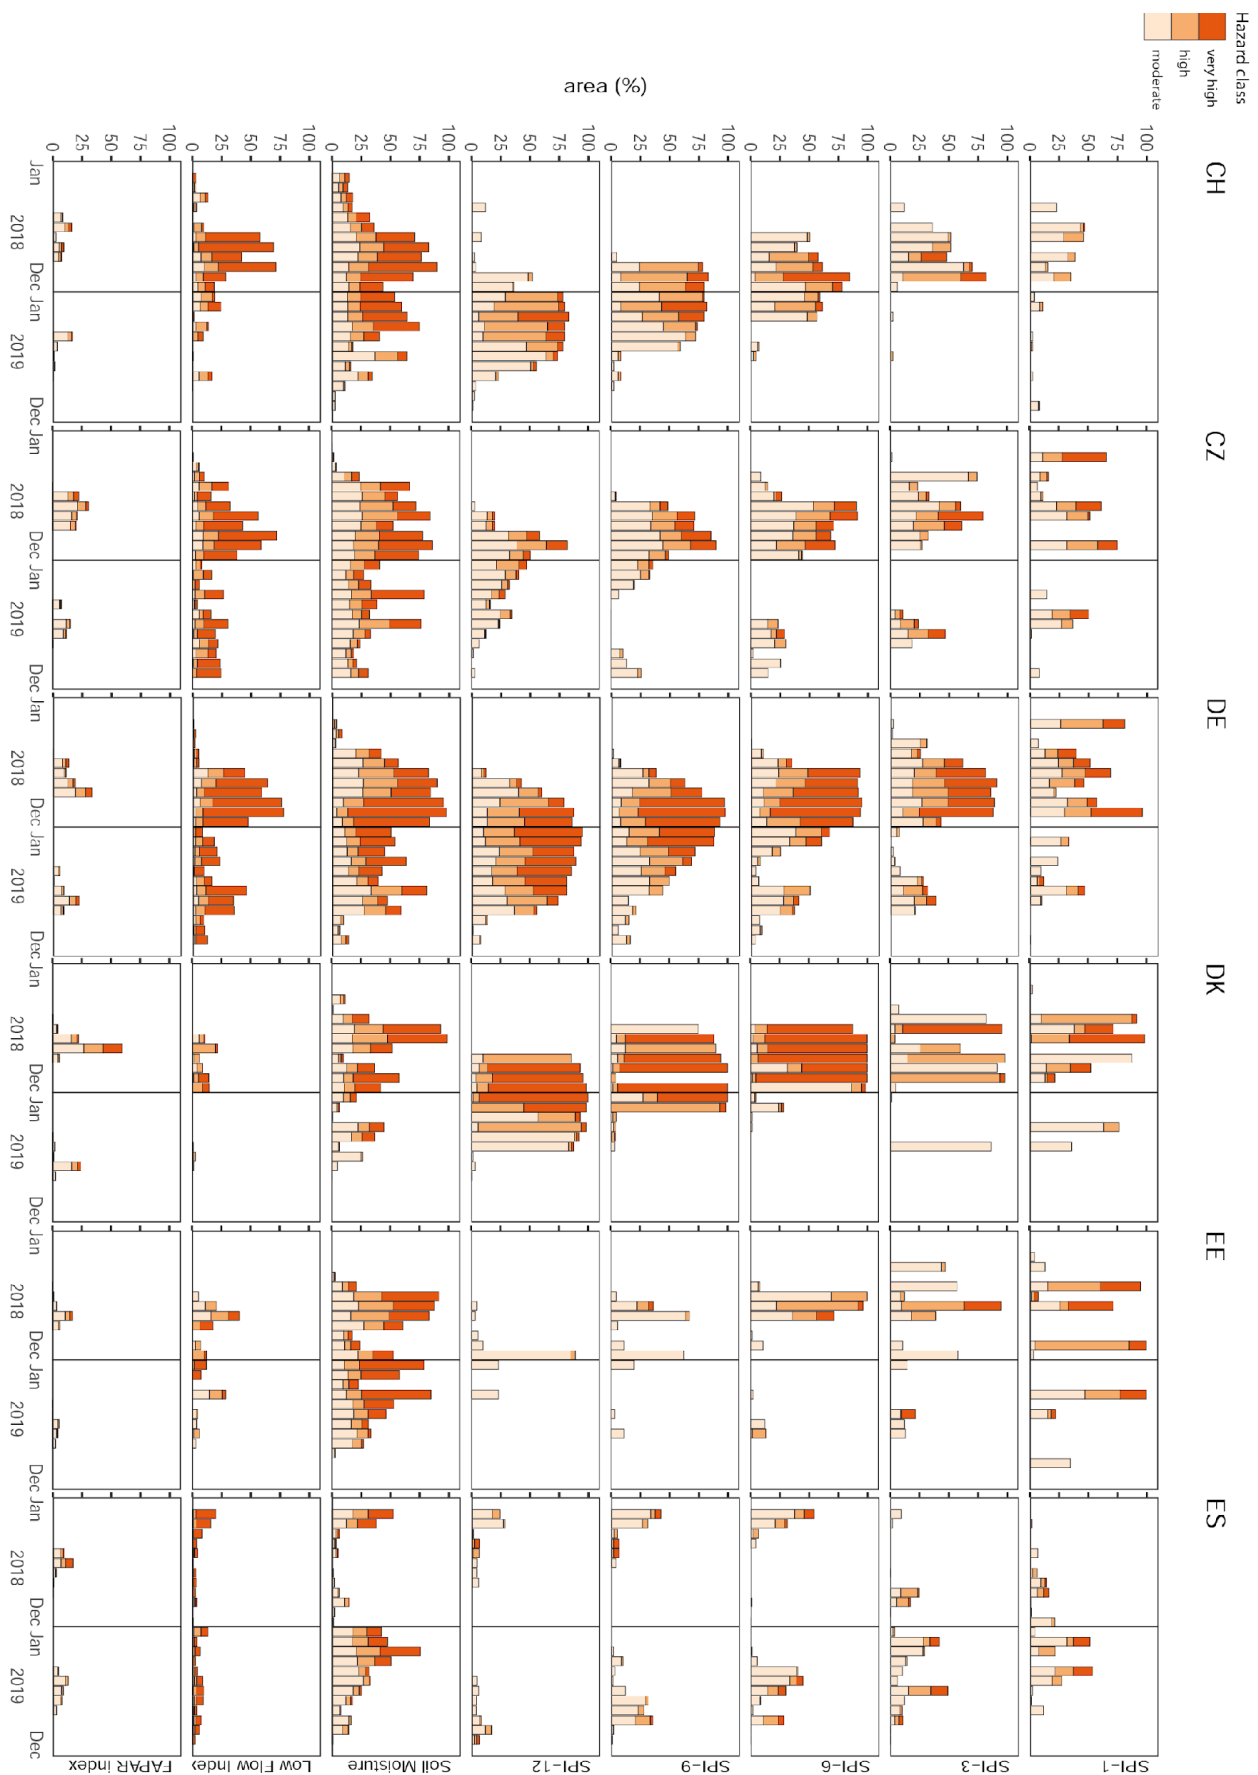

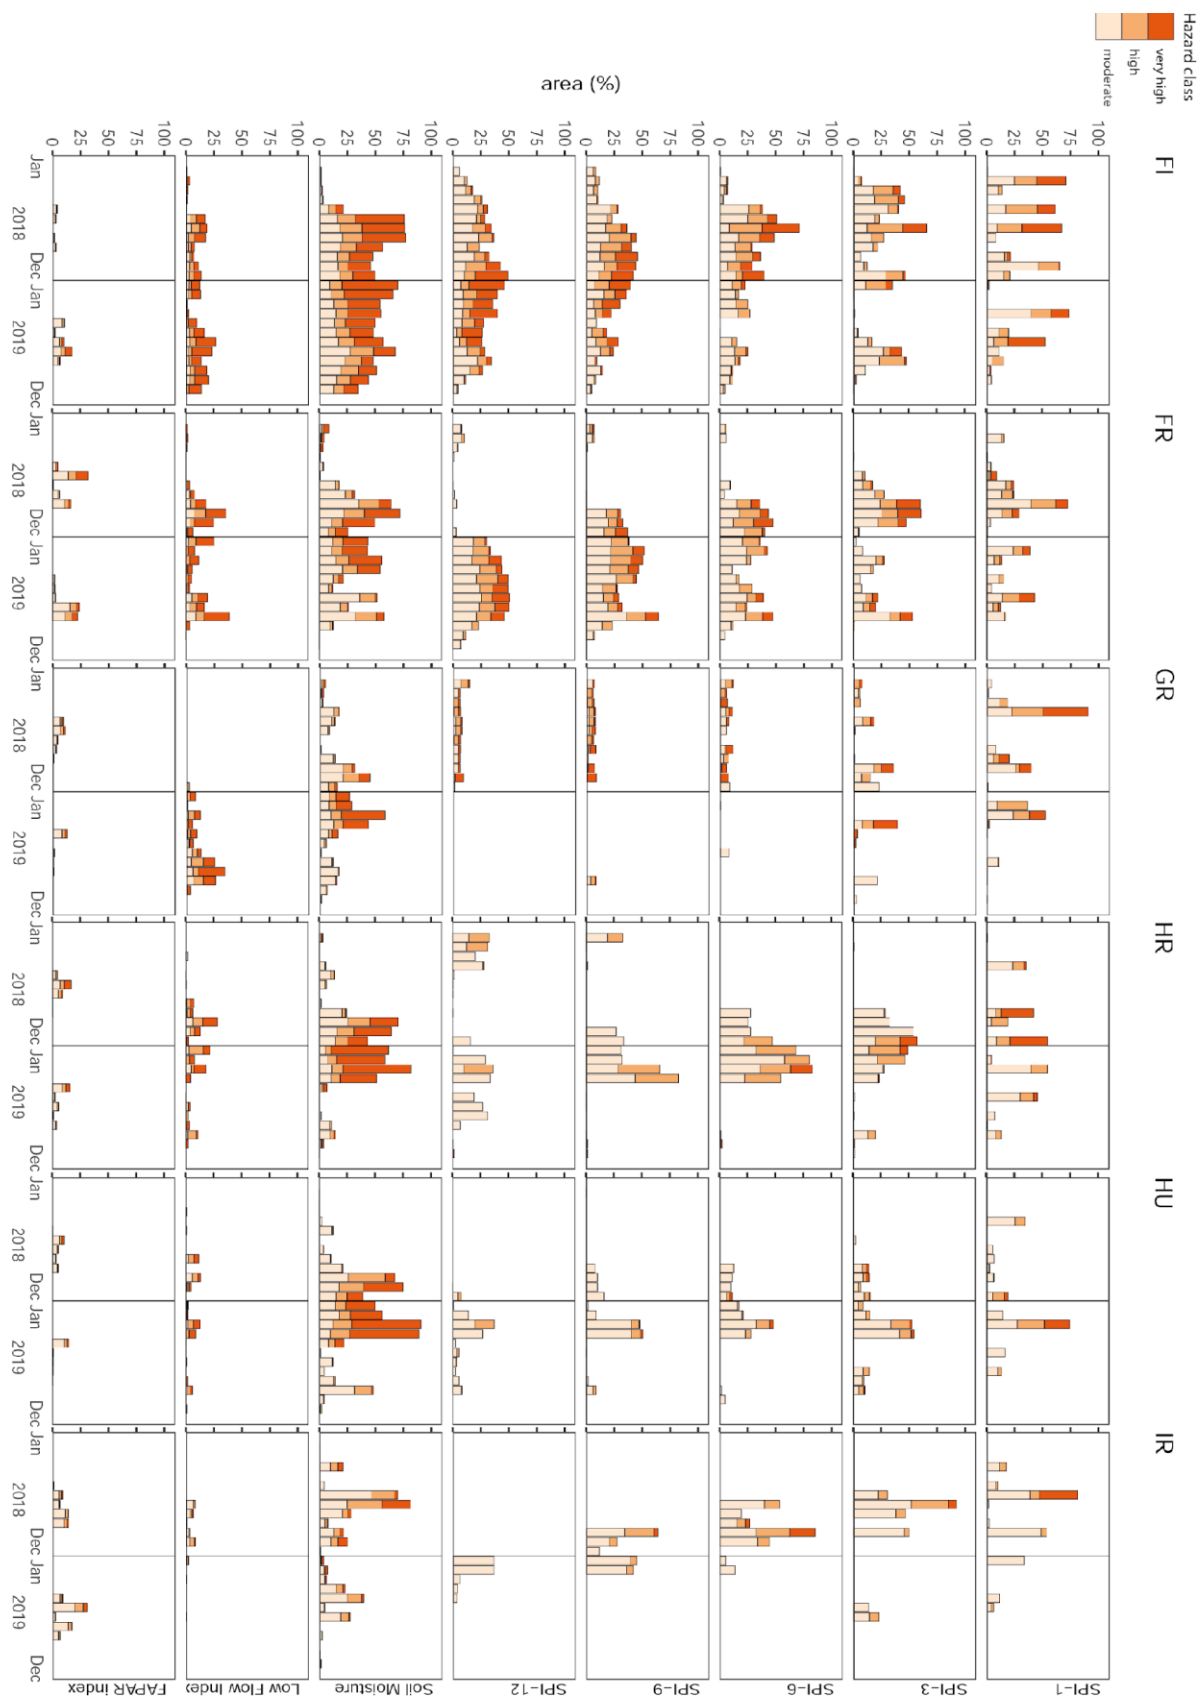

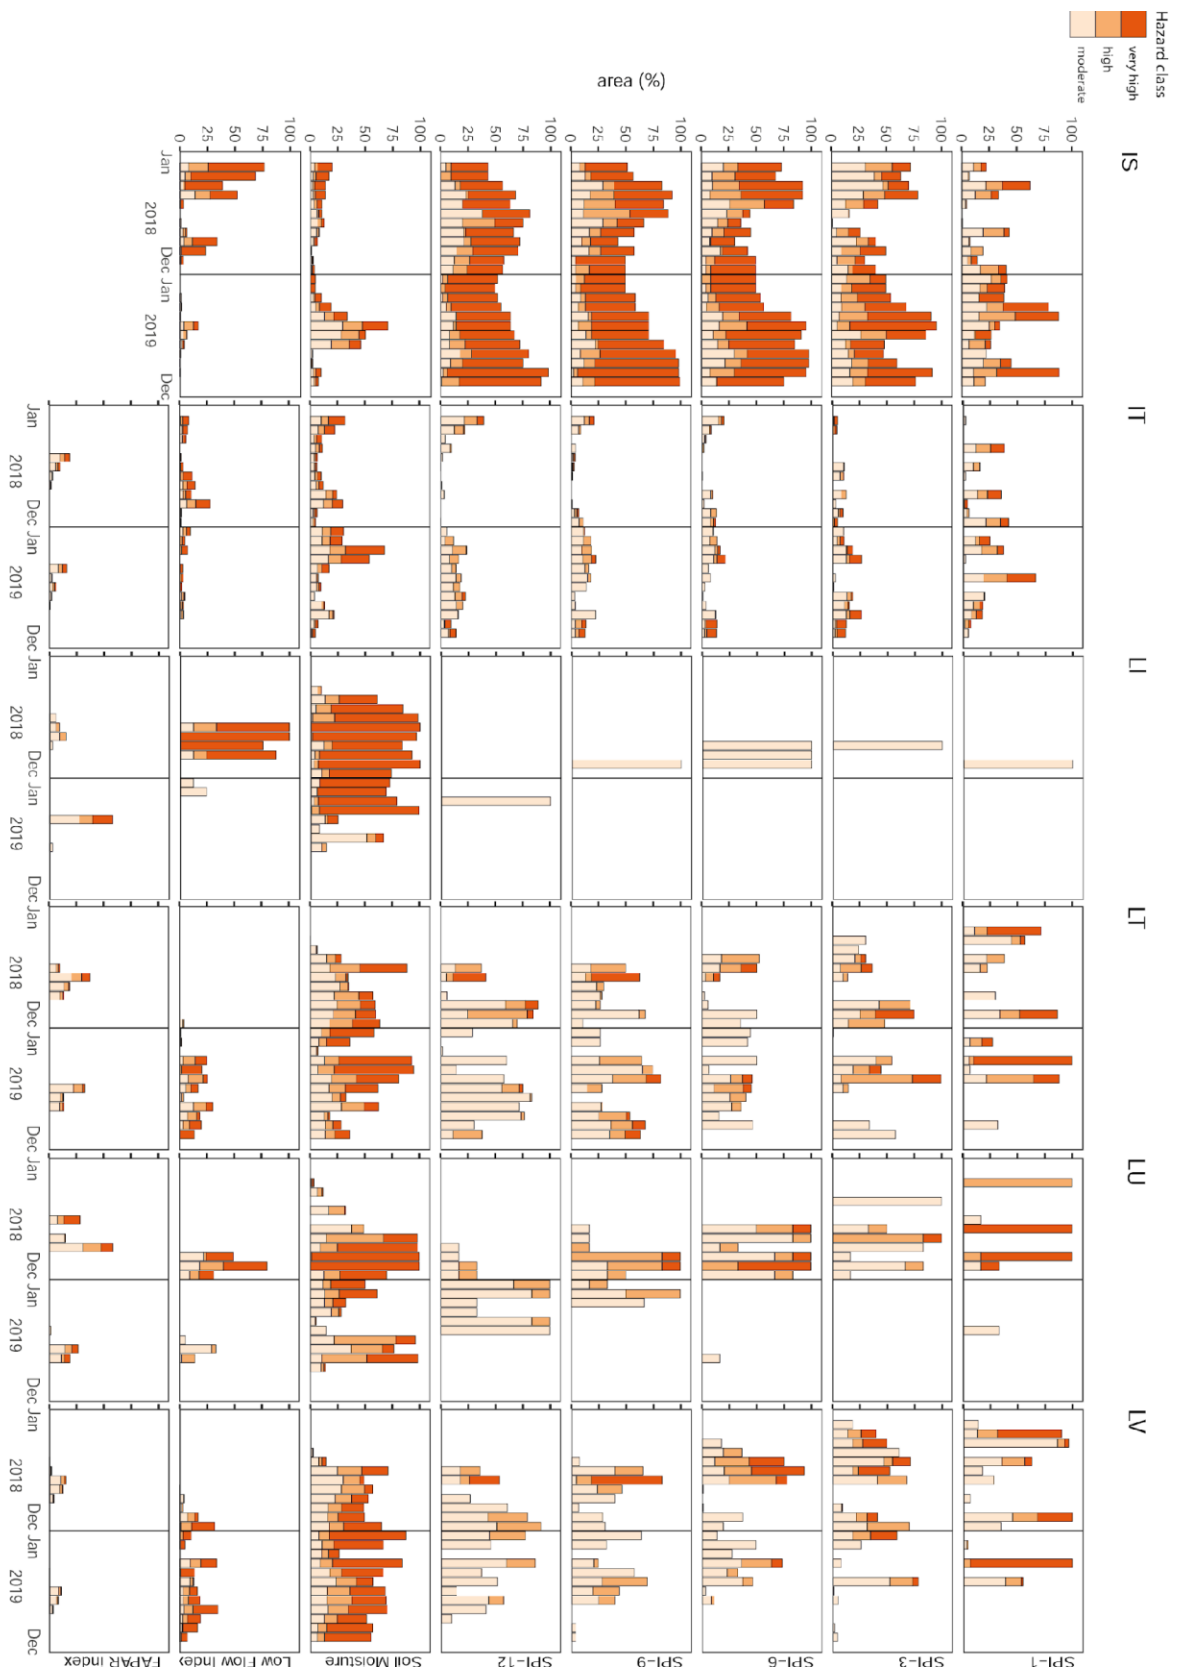

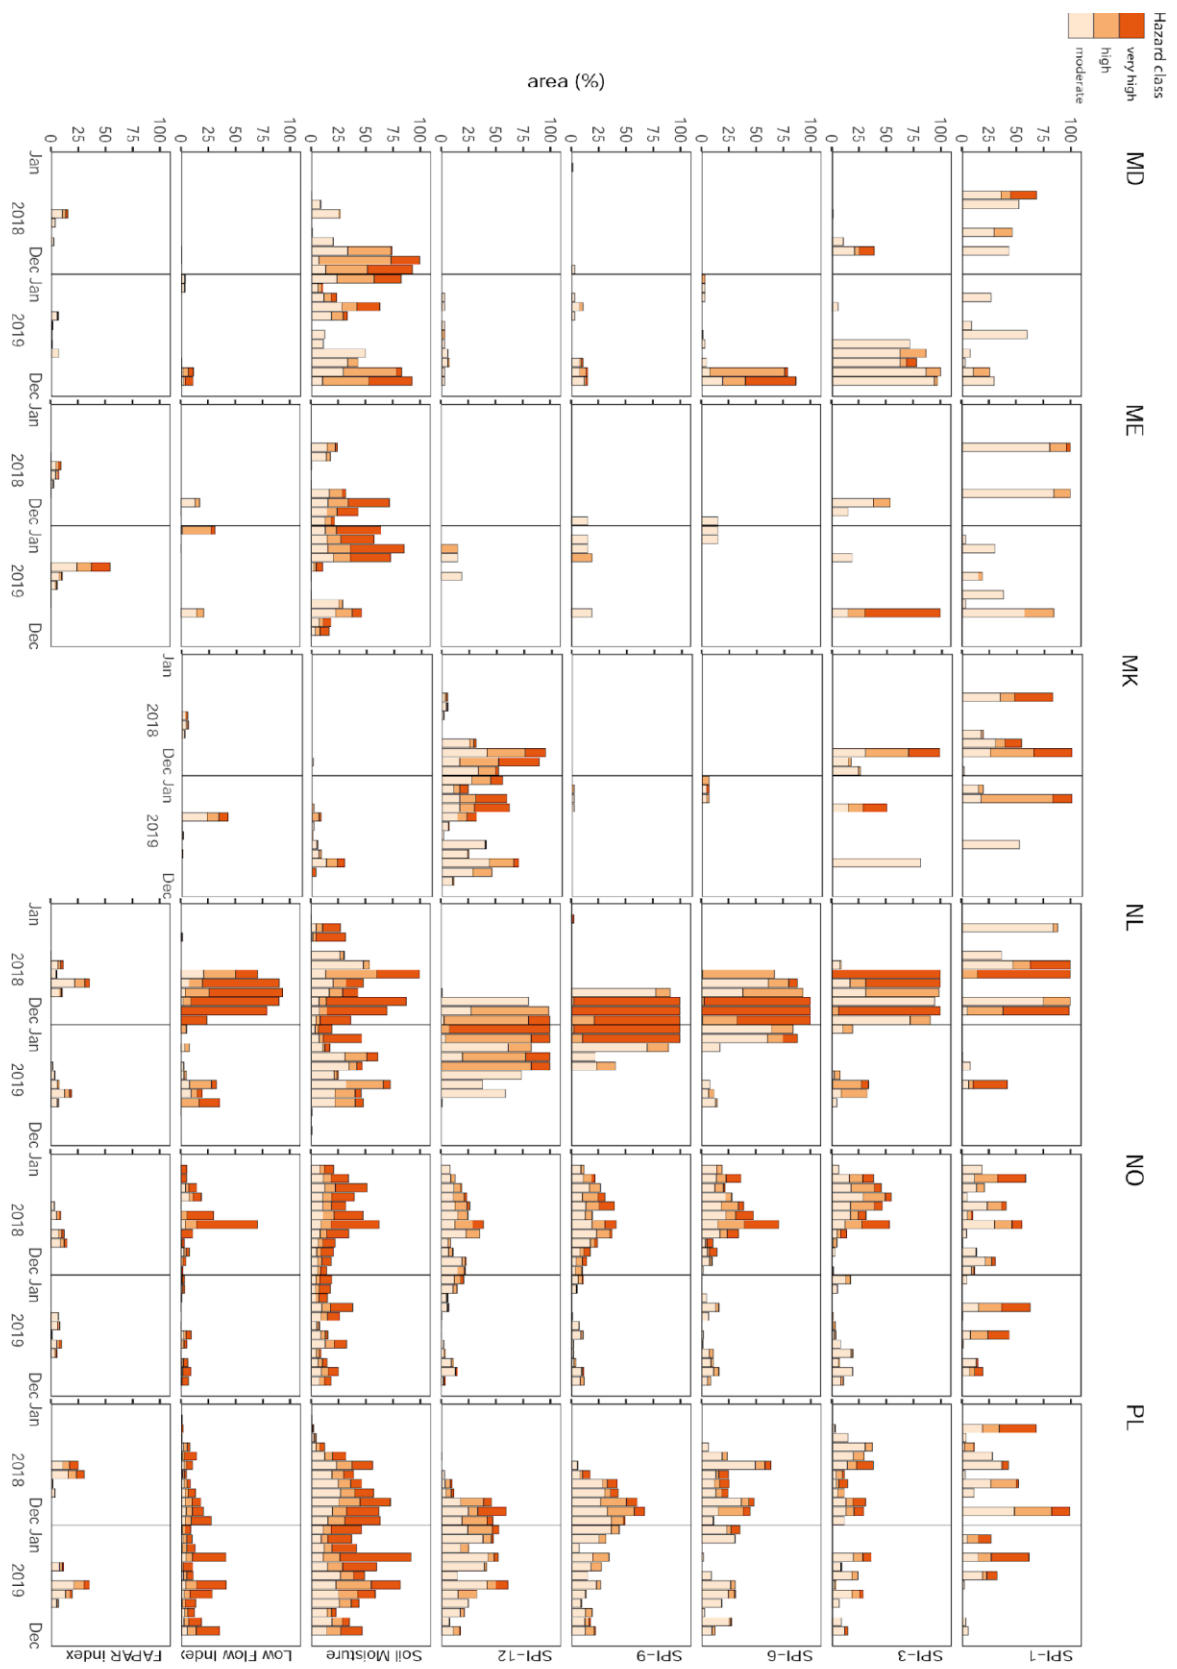

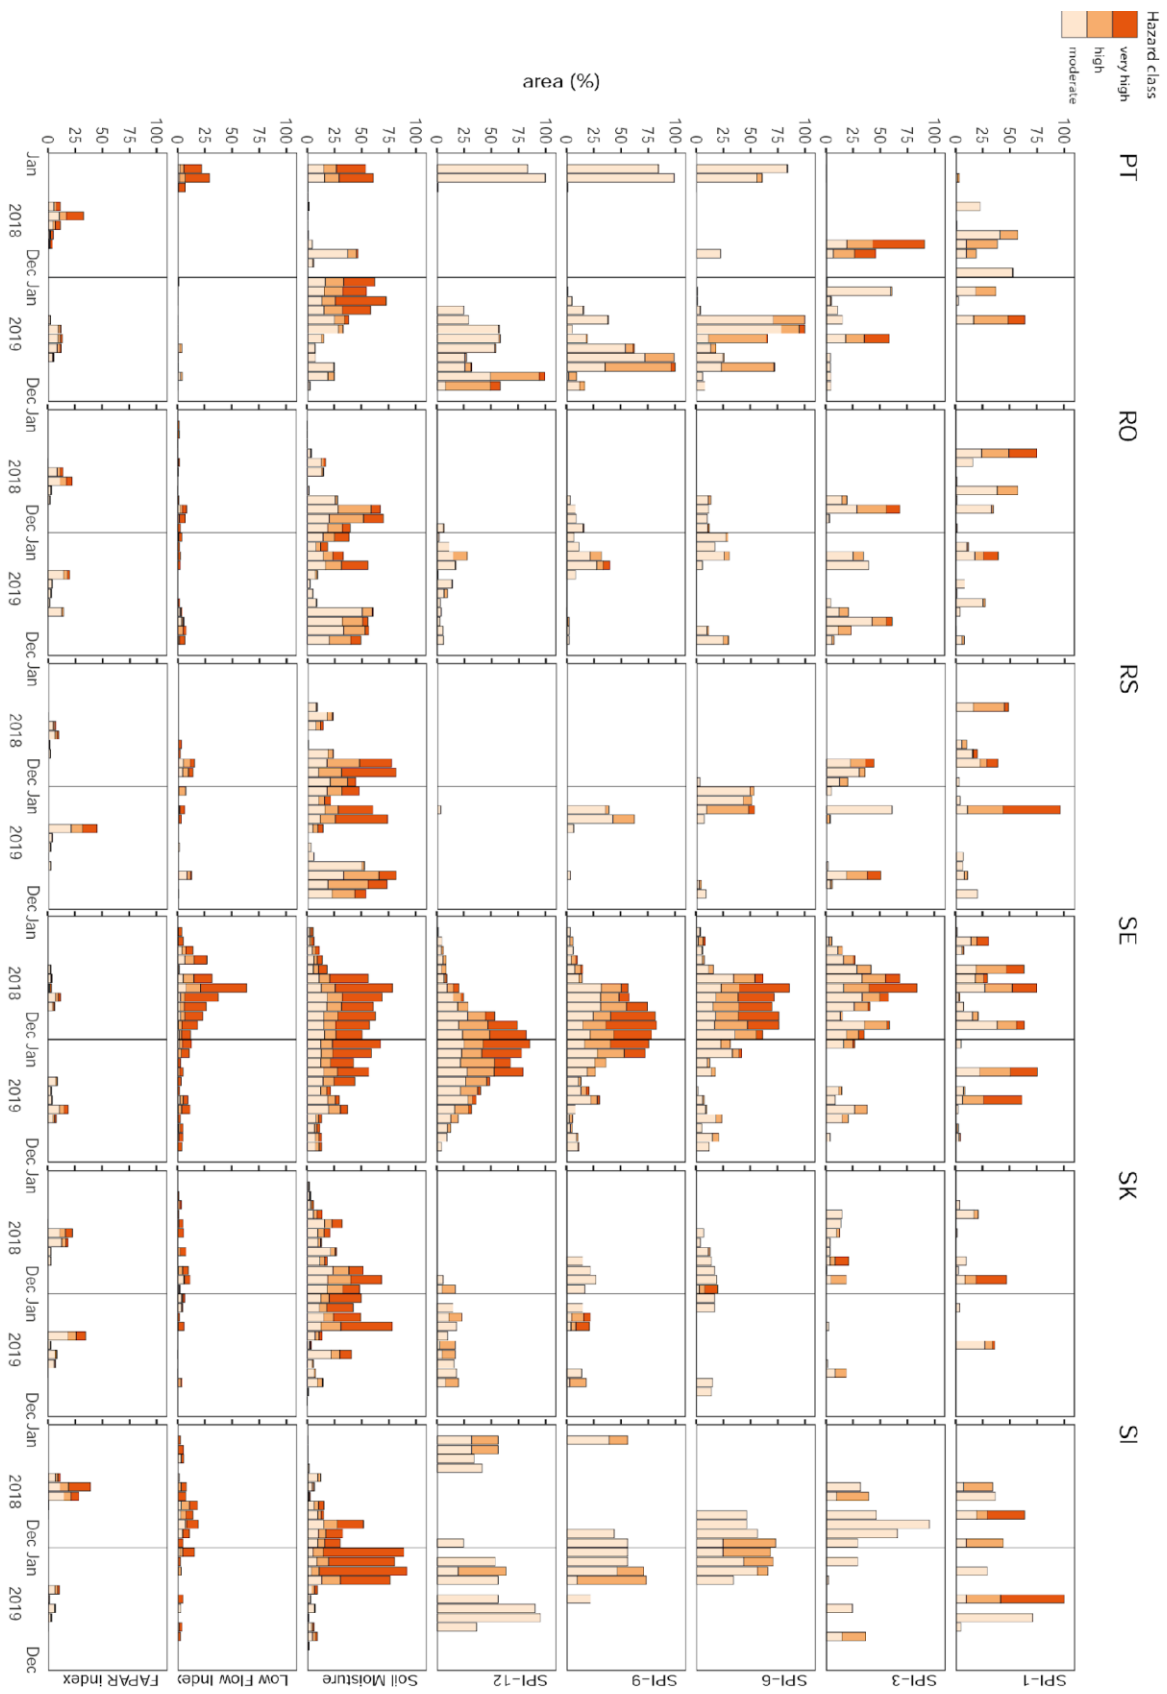

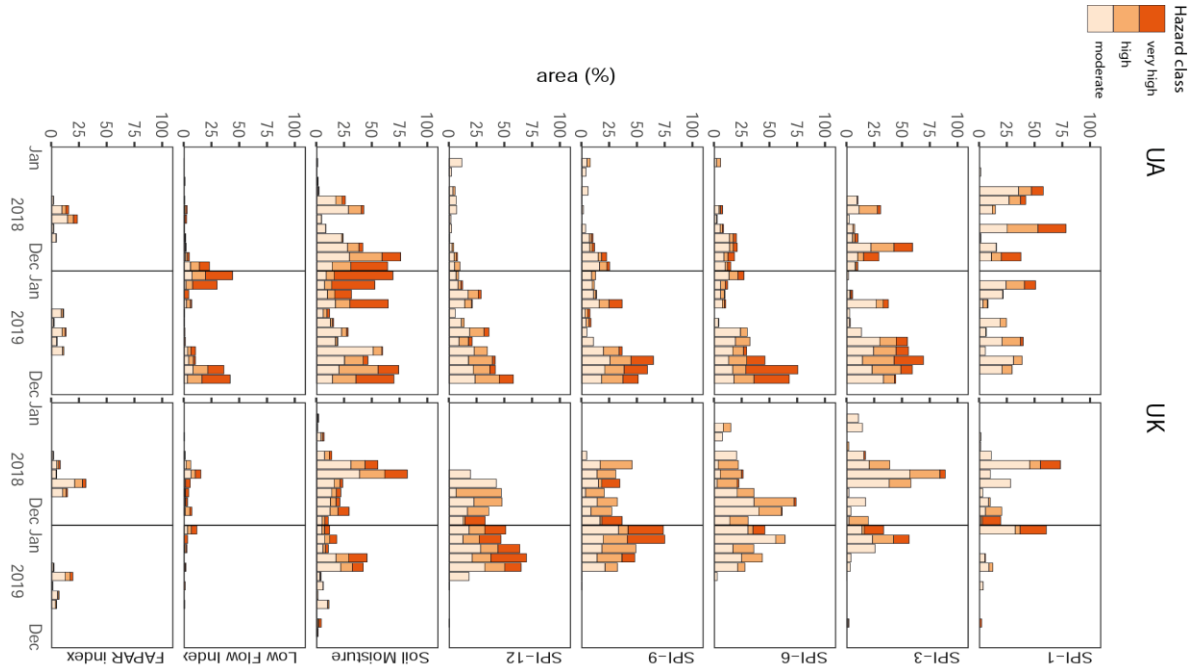

**Figure S1. Drought hazard conditions for 2018-2019 by country and different drought indices: SPI, Soil Moisture (Index), Low Flow Anomaly and FAPAR are monthly averages of three 10-day intervals**



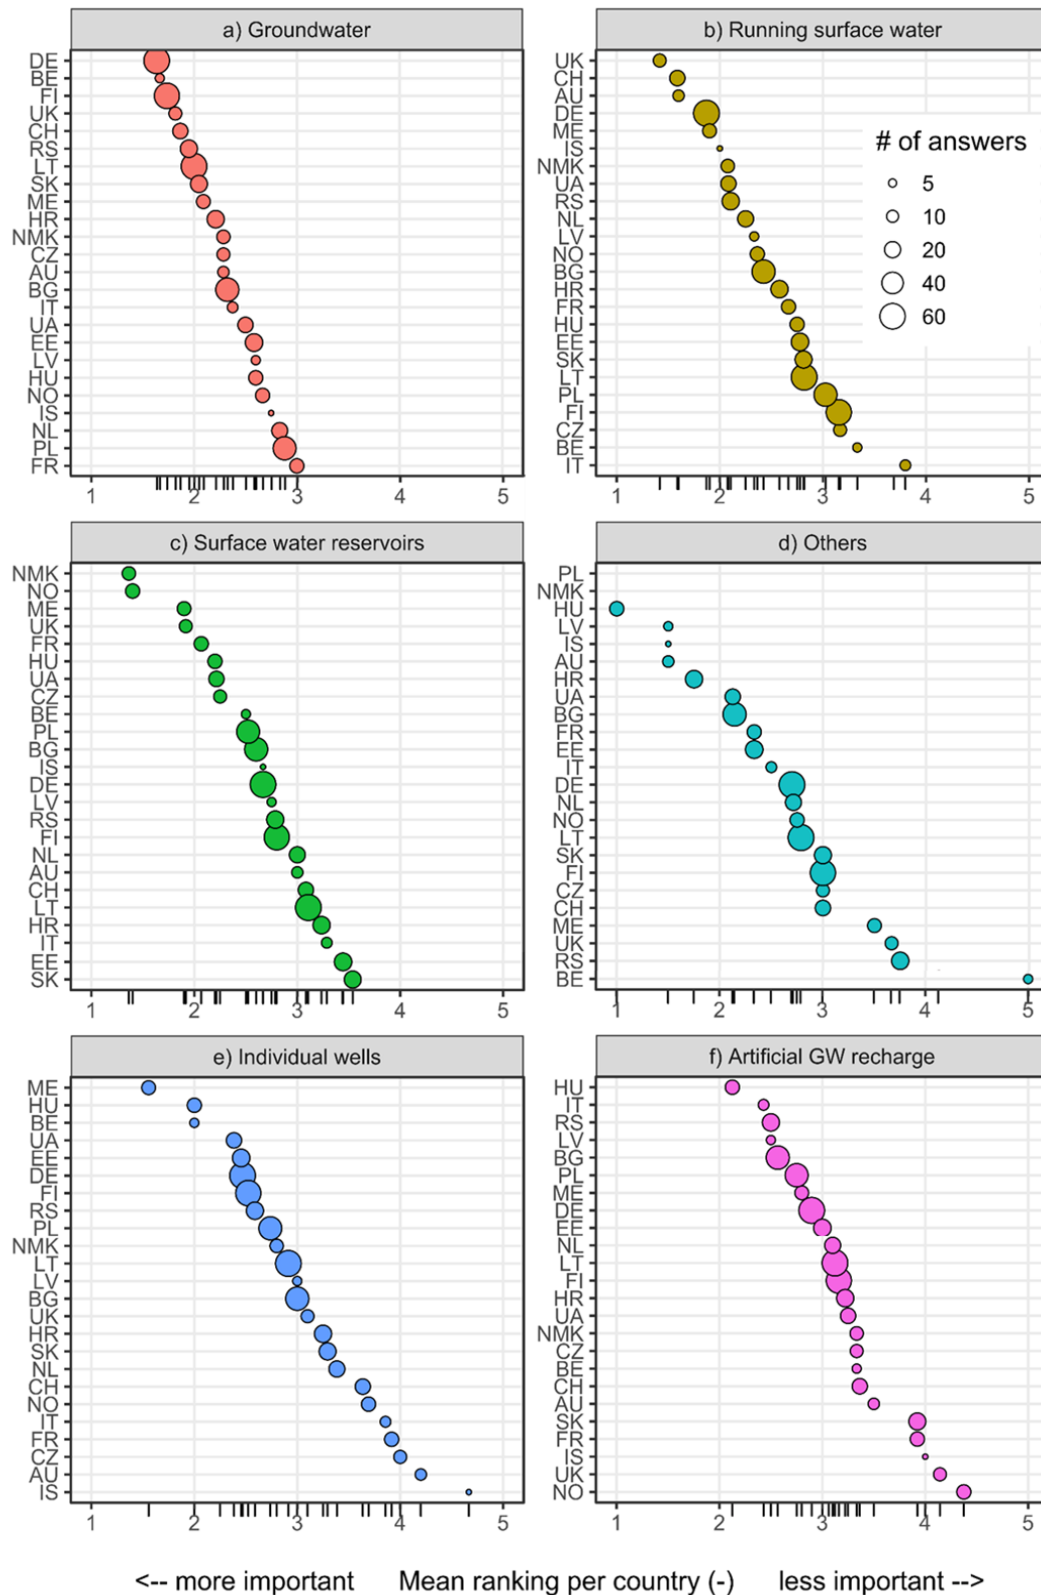

Figure S2: importance of water resources by country; ordered by importance

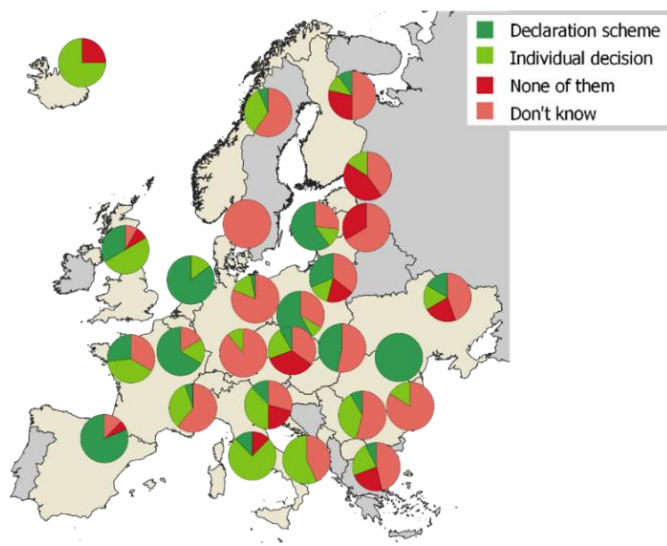

Figure S3: existence of a country- or county wide drought declaration scheme

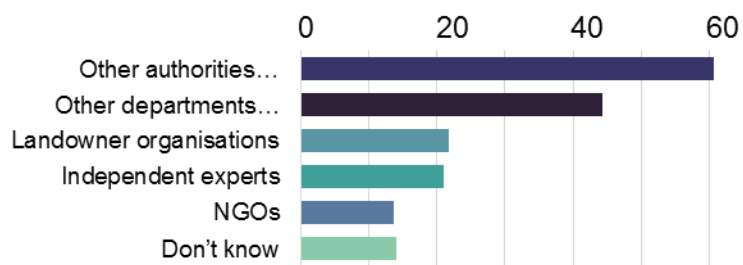

Figure S4: overall percentage of participants that during drought collaborate with...

My experience was that the hydro-climatic situation of 2018 was ...

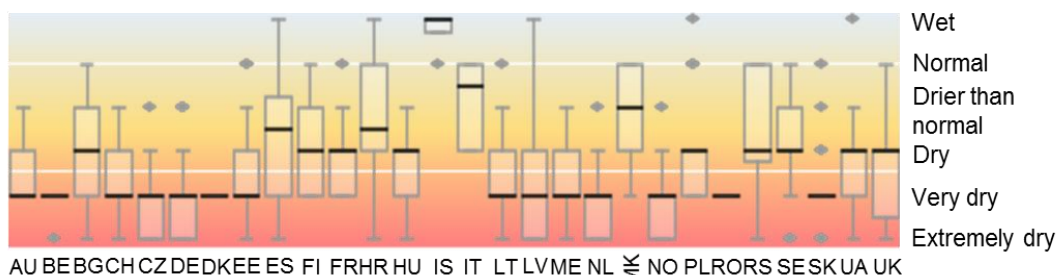

What is your assessment of how well your company/organisation/municipality managed the 2018 drought?

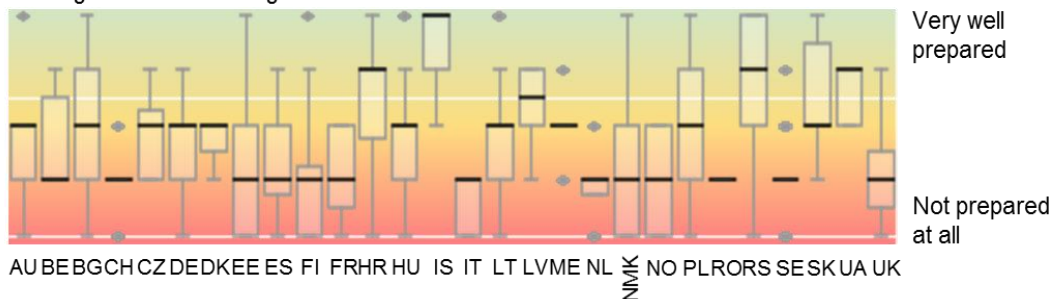

What is your assessment of how well your company/organisation/municipality was prepared for the 2018 drought?

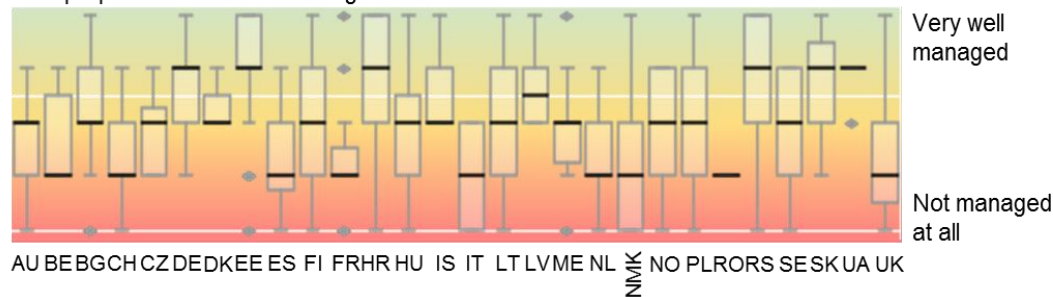

What is your assessment of how seriously your company/organisation/municipality was affected by the 2018 drought?

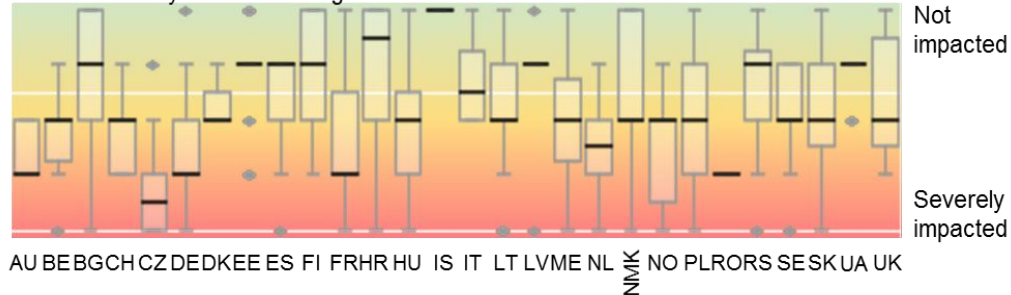

Figure S5: country wise perception of the 2018 drought event

My experience was that the hydro-climatic situation of 2019 was ...

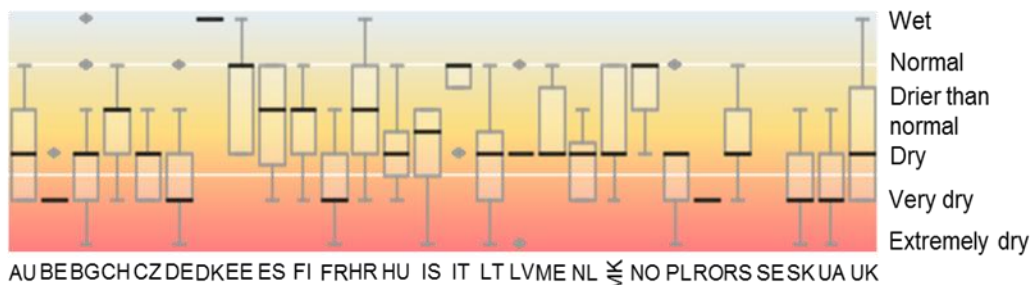

What is your assessment of how seriously your company/organisation/municipality was affected by the 2019 drought?

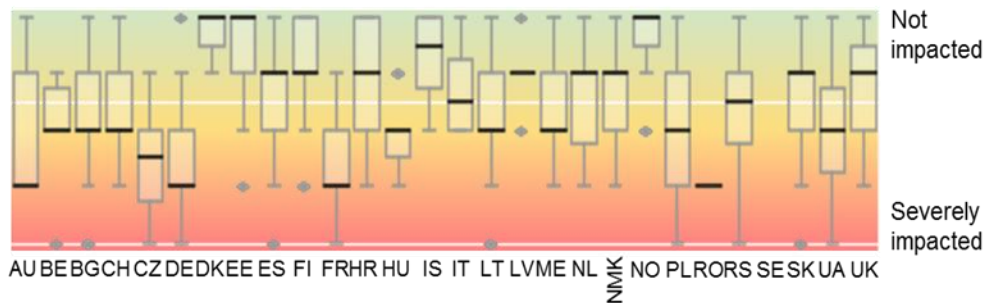

Figure S6: country wise perception of the 2019 drought event

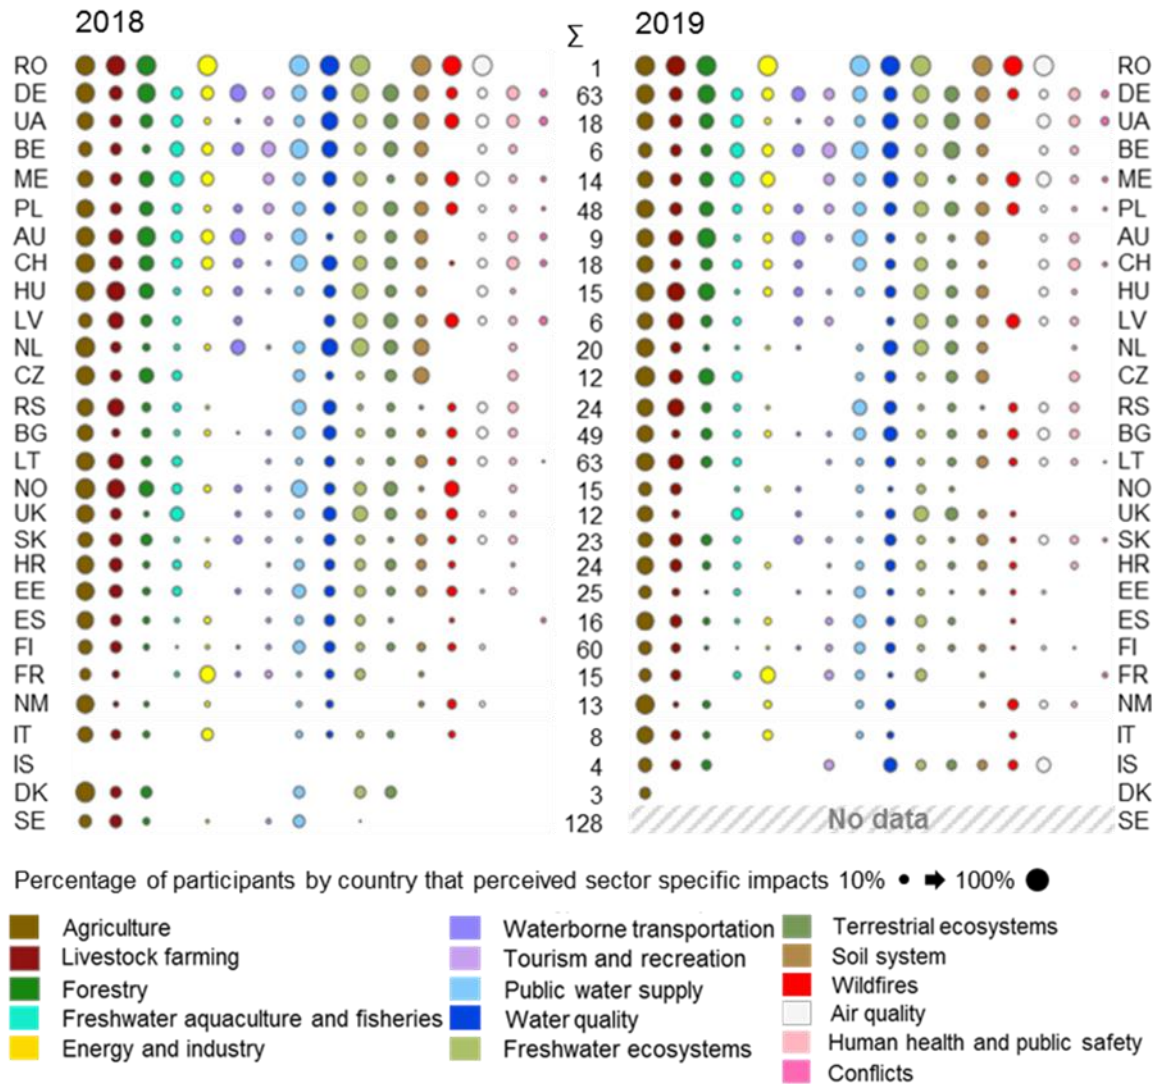

Figure S7: percentage of participants that perceived drought impacts in their region by year and sector;  $\Sigma$  = number of participants by country, order by average percentage of impacts perceived.

| ID  | Question                                               |
|-----|--------------------------------------------------------|
| B   | Background                                             |
| B.0 | What kind of organisation do you belong to?            |
| B.1 | In which country is your municipality/ company located |
| B.2 | Which municipality do you work in                      |
| B.3 | What is the major business/ role of your organisation? |
| B.4 | What is your role in your organisation?                |

|       |                                                                                                                                                                            |
|-------|----------------------------------------------------------------------------------------------------------------------------------------------------------------------------|
| B.5   | What type of main water resource do you have in your organisation/ municipality? Please rank your selections by importance (1 most important).                             |
| B.6   | Do you in your municipality/ company consider how future climate change may affect water resources?                                                                        |
| B.7   | We assume that the occurrence of droughts in the future will...                                                                                                            |
| B.8   | Do you think that water providers in the future will have to regulate the distribution of drinking water to different consumers due to water shortages?                    |
| C     | Applied concepts and terminology                                                                                                                                           |
| C.1   | Do you in your municipality/ company have an operational drought definition? If so, which physical indicators is the definition based on?                                  |
| C.1.2 | Please specify the applied drought definition and physical drought indices.                                                                                                |
| C.2   | In your country or county, does a governmental, operational drought declaration system exist or is the declaration of drought situations based on case specific decisions? |
| D     | Drought management                                                                                                                                                         |
| D.1   | In our work with droughts we collaborate with ... (multiple answers possible)                                                                                              |
| D.2   | With regard to drought risk management do you in your municipality/ company currently have a ...(please specify)                                                           |
| D.3   | Why is there no drought risk management plan? (multiple answers possible)                                                                                                  |
| D.4   | Do you have plans to introduce a drought risk management plan?                                                                                                             |
| E     | 2018                                                                                                                                                                       |
| E.1   | My experience was that the hydro-climatic situation of 2018 was ...                                                                                                        |
| E.2   | What is your assessment of how well your organization/municipality managed the 2018 drought?                                                                               |
| E.3   | What is your assessment of how well your organization/municipality was prepared for the 2018 drought?                                                                      |
| E.4   | What is your assessment of how seriously your organization/municipality was affected by the 2018 drought?                                                                  |
| E.5   | Which sectors / services / businesses were negatively affected in your municipality by the drought during 2018? (multiple answers possible)                                |
| F     | 2019                                                                                                                                                                       |
| F.1   | My experience was that the hydro-climatic situation of 2019 was ...                                                                                                        |
| F.2   | Did your organisation/municipality manage the 2019 drought better than the year before?                                                                                    |
| F.3   | Was your municipality/ organisation prepared better than 2018?                                                                                                             |
| F.4   | What is your assessment of how seriously your organization/municipality was affected by the 2019 drought?                                                                  |
| F.5   | Did the preceding drought of 2018 play a crucial role for the impacts of 2019?                                                                                             |
| F.6   | Which sectors / services / businesses were negatively affected in your municipality by the drought during 2019?                                                            |

**Table S1. Questions of the pan-European survey in English. For each participating country, the survey was translated to local language(s). For the majority of questions, the possibility for additional free text reply was provided.**
